# Supplementary material
Source: PubMed Central journal article supplement (PMC4034750)

## **ELECTRONIC SUPPLEMENTARY MATERIAL**

### **Next-generation active immunization approach for synucleinopathies - implications for Parkinson's Disease clinical trials**

Markus Mandler<sup>1</sup>, Elvira Valera<sup>2</sup>, Edward Rockenstein<sup>2</sup>, Harald Weninger<sup>1</sup>, Christina Patrick<sup>2</sup>, Anthony Adame<sup>2</sup>, Radmila Santic<sup>1</sup>, Stefanie Meindl<sup>1</sup>, Benjamin Vigl<sup>1</sup>, Oskar Smrzka<sup>1</sup>, Achim Schneeberger<sup>1</sup>, Frank Mattner<sup>1</sup>, Eliezer Masliah<sup>2,3</sup>

AFFiRiS AG<sup>1</sup>, Vienna Biocenter, A-1030 Vienna, Austria

Departments of <sup>2</sup>Neurosciences and <sup>3</sup>Pathology,  
University of California, San Diego, La Jolla, California 92093, USA

Note: Markus Mandler and Elvira Valera are co-first authors

Correspondence and reprint requests should be addressed to: Eliezer Masliah, M.D. University of California, San Diego, 9500 Gilman Drive, La Jolla, CA 92093-0624. Phone: 858-534-8992, Fax: 858-534-6232, email: [emasliah@ucsd.edu](mailto:emasliah@ucsd.edu)

# Supp. Fig 1

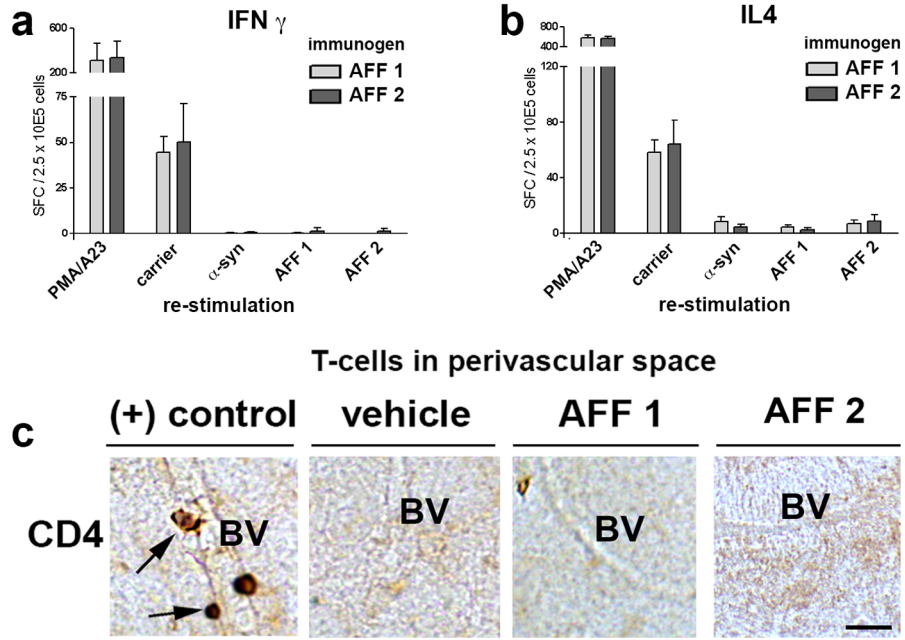

Supp. Fig 2

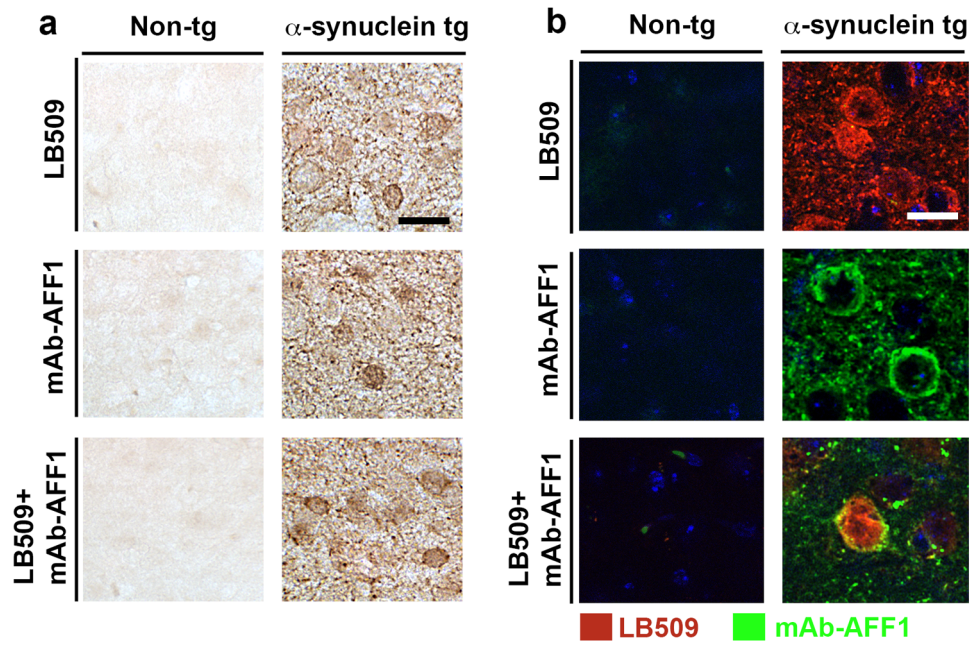

### Supp. Fig 3

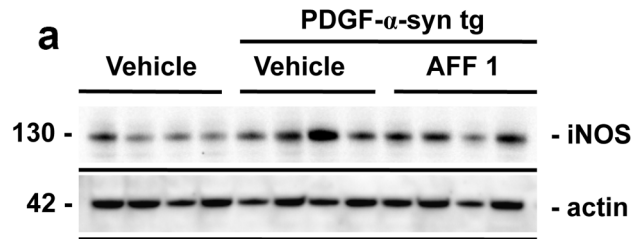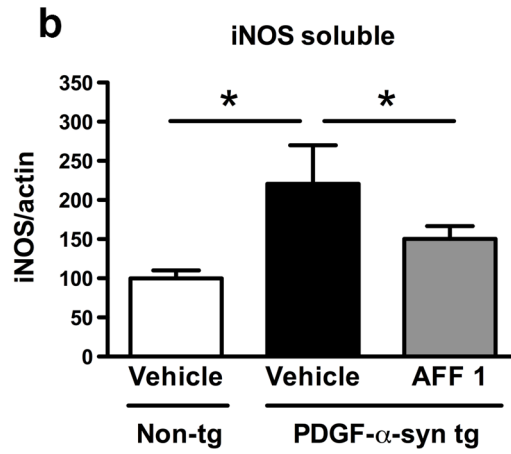

Supplement: NIHMS566220-supplement-2.pdf [file NIHMS566220-supplement-2.pdf]
